# Supplementary material for: Species-Specific Nitrogen Resorption Efficiency in Quercus mongolica and Acer mono in Response to Elevated CO2 and Soil N Deficiency
Source: MDPI journal article supplement (doi:10.3390/f12081034), 2021-08-04
Supplement: s1 [file s1]

Archive with 3 entries (3 files):
- manuscript.v7-FigureS1.pdf
- manuscript.v7-TableS1.pdf
- manuscript.v7-TableS2.pdf
