# Supplementary material for: Species-Specific Nitrogen Resorption Efficiency in Quercus mongolica and Acer mono in Response to Elevated CO2 and Soil N Deficiency
Source: MDPI journal article supplement (doi:10.3390/f12081034), 2021-08-04
Supplement: s1 [file s1]

**Table S1.** Relative growth rate of whole plant weight (total-W-RGR), leaf area ratio (LAR), leaf weight ratio (LWR), fine root ratio (fine RWR/RW), and T/R ratio in *Quercus mongolica* (*Quercus*) and *Acer mono* (*Acer*). Mean values (standard error) for each treatment are shown ( $n = 6$ ). Results of ANOVA ( $F$ -value) for CO<sub>2</sub> treatments (ambient: ambient CO<sub>2</sub>; elevated: elevated CO<sub>2</sub>) and N treatments (high N, low N) are shown. \*  $p < 0.05$ ; \*\*  $p < 0.01$ ; \*\*\*  $p < 0.001$ .

| Characteristics                                            | Species        | High N      |             | Low N       |             | Source of variance |         |                     |
|------------------------------------------------------------|----------------|-------------|-------------|-------------|-------------|--------------------|---------|---------------------|
|                                                            |                | Ambient     | Elevated    | Ambient     | Elevated    | CO <sub>2</sub>    | N       | CO <sub>2</sub> x N |
| Total-W-RGR<br>(g g <sup>-1</sup> 100 days <sup>-1</sup> ) | <i>Quercus</i> | 2.06 (0.10) | 2.62 (0.15) | 1.70 (0.11) | 1.76 (0.10) | 5.8*               | 23.0*** | 4.0                 |
|                                                            | <i>Acer</i>    | 1.93 (0.09) | 2.03 (0.17) | 1.74 (0.11) | 1.82 (0.11) | 0.50               | 2.5     | 0.00                |
| LAR<br>(m <sup>2</sup> g <sup>-1</sup> )                   | <i>Quercus</i> | 34.3 (2.7)  | 27.9 (1.4)  | 26.8 (2.5)  | 21.0 (2.2)  | 6.8*               | 9.3**   | 0.02                |
|                                                            | <i>Acer</i>    | 25.3 (1.1)  | 24.8 (1.4)  | 29.7 (1.8)  | 28.6 (2.6)  | 0.18               | 4.8*    | 0.04                |
| LWR<br>(g g <sup>-1</sup> )                                | <i>Quercus</i> | 0.24 (0.02) | 0.23 (0.01) | 0.18 (0.01) | 0.20 (0.01) | 0.11               | 5.5*    | 1.0                 |
|                                                            | <i>Acer</i>    | 0.19 (0.01) | 0.21 (0.01) | 0.19 (0.01) | 0.23 (0.02) | 5.8*               | 1.9     | 0.43                |
| Fine RW/RW<br>(g g <sup>-1</sup> )                         | <i>Quercus</i> | 35.0 (2.9)  | 32.9 (2.0)  | 35.0 (3.2)  | 31.8 (3.6)  | 0.91               | 0.04    | 0.03                |
|                                                            | <i>Acer</i>    | 36.6 (1.8)  | 43.0 (2.8)  | 42.7 (3.0)  | 48.7 (2.1)  | 6.4*               | 5.8*    | 0.01                |
| T/R                                                        | <i>Quercus</i> | 1.3 (0.2)   | 1.4 (0.1)   | 0.6 (0.03)  | 0.7 (0.05)  | 0.33               | 40.8*** | 0.07                |
|                                                            | <i>Acer</i>    | 1.1 (0.1)   | 1.1 (0.1)   | 0.8 (0.08)  | 1.0 (0.1)   | 1.4                | 3.1     | 0.86                |
