# Supplementary material for: Species-Specific Nitrogen Resorption Efficiency in Quercus mongolica and Acer mono in Response to Elevated CO2 and Soil N Deficiency
Source: MDPI journal article supplement (doi:10.3390/f12081034), 2021-08-04
Supplement: s1 [file s1]

**Table S2.** Allocation coefficient of leaf N to carboxylase reactions ( $F_r$ : g N in Rubisco (g total leaf N)<sup>-1</sup>) and to bioenergetic pools ( $F_b$ ; g N in cytochrome f, ferredoxin NADP reductase, and coupling factor (g total leaf N)<sup>-1</sup>) in *Alnus hirsuta*. Mean values (standard error) for each treatment are shown ( $n = 6$ ). Results of ANOVA ( $F$ -value) for CO<sub>2</sub> treatments (ambient: ambient CO<sub>2</sub>; elevated: elevated CO<sub>2</sub>) and N treatments (high N, low N) are shown. \*  $p < 0.05$ . This supplementary information is a new analysis of data from the experiment of Tobita et al. (2005) and Tobita et al. (2011).

| Characteristics | High N        |               | Low N         |               | Source of variance |      |                     |
|-----------------|---------------|---------------|---------------|---------------|--------------------|------|---------------------|
|                 | Ambient       | Elevated      | Ambient       | Elevated      | CO <sub>2</sub>    | N    | CO <sub>2</sub> x N |
| $F_r$           | 0.38 (0.015)  | 0.36 (0.010)  | 0.37 (0.018)  | 0.33 (0.017)  | 5.5*               | 3.1  | 0.20                |
| $F_b$           | 0.051 (0.003) | 0.052 (0.003) | 0.049 (0.002) | 0.050 (0.003) | 0.33               | 0.27 | 0.04                |
